# Supplementary material for: CircEAF2 counteracts Epstein-Barr virus-positive diffuse large B-cell lymphoma progression via miR-BART19-3p/APC/β-catenin axis
Source: PubMed Central journal article supplement (PMC8638185; doi:10.1186/s12943-021-01458-9), 2021-12-01
Supplement: 12943_2021_1458_MOESM2_ESM.pdf [file 12943_2021_1458_MOESM2_ESM.pdf]

**A**

```

AGACGCCATCCACGCTGTTTTGACCTCCATAGAAGATTCTAGAGCTAGC GAATTCgctccgaggagctgaatgttctattctgattgggtgg
tggttacatgtgctactgtgtaaaagcacaagcttaattttgtctctttgcatataccataitaaataaggagcctaatgtatataaacacagggaactatatacagaattattgctgtgatgtatctc
fatgaattagtttaaatgctttaattgcttagagggttttaagcttgttaaacatgtgaaatcttagtaccctgaatttccctctagatgatagatttaagtcacggttgaactatgatttaactcaaaft
aaatgtattttaagatctcctaaagtgacagatttggtaaatatacatcttagtggtgtacataftcagaaaaaactgttaactagaagattacttttcttaagttctcttaataatgactgtatttg
ctatgtattcattttttggatagaatgacagacaaagtgtagtagaatgacagacaagtgtagtaggacacaaaggcttttaaaaaaattatggccaacattcagaactaagtcagcag
ccataaaaaacataaaaaa gaaaaatttattgaaaaaaaggactgaaaattgaaaacatctacatatacgttttttagcaagttgtgaaaacactgacattatagtttttagcagtagaacattgtt
agtcaggtcattctgtcaaacaggattctatggaagcatgagtcagtaattctgttttagatagatgctatttttctcagaattatgcatacagaataaataaactagattgtattttgttctattt
gtaatatgaacttttaaccattttaattacaagctctgaaaaatgattatcctctgaacaatgctcataattttatatacctcaaatatcattttacaaaattggtattgtatctatttagATGA
CTTCAAACCTGCTTCTATTGACACTTCTTCTGAAGGATACCTTGAGGTTGGTGAAGGTGAACAGGTGACCATAACTCTG
CCAAATATAGAAGGTTCAACTCCACCAGTAACCTGTTTTCAAAGGTTCAAAAAACCTTACTTAAAAGAATGCATTTTGA
TTATTAACCATGATACTGGAGAATGTCGGCTAGAAAACTCAGCAGCAACATCACTGTAAAAAACAAGAGTTGAAG
GAAGCAGTAAAAATTCAGTATCGTAAAGAACAACAGCAACAACAAATGTGGAATTCAGCCAGGACTCCCAATCTTGTA
AACATTCTCCATCTGAAGATAAGATGTCCCCAGCATCTCCAATAGATGATATCGAAAGAGAAGTGAAGGCAGAAGCTA
GTCTAATGGACCAGATGAGTAGTTGTGATAGTTCATCAGATTCCAAAAGTTCATCATCTTCAAGTAGTGAGGATAGTTC
TAGTGACTCAGAAGATGAAGATTGCAAATCCTCTACTTCTGATACAGGGAATTGTGTCTCAGGACATCTACCATGACA
CAGTACAGGATTCCTGATATAGATGCCAGTCATAATAGATTTCGAGACAACAGTGGCCTTCTGATGAATACTTTAAgtaag
atacaataacacaggaattgaaaaagtaagaattatagtgagaccatattgattgtgacataatgttataaa gaaaaagatcctattttatgcatftgatactataataatcattttatgaafta
tggttttcttgaactgtgacataagcctcttggttttctccctctctagataatcttctctcactcttccaagtttatatgctctcagtcattaaagttggagtttctcaaggttactttt
ggttcttttttttcttcaataatttcccaataaactcctccatgtttctgtgagcagaactatgtgtagtgaactgcaaatattatctctgattcaaacctctagcctttagacacatgttaacat
catctccatctctcaactcctcaatttctgccaacccaactcataatcaactttgctcactgtgttacctcttagtgaggtgacatactaatgcaaatcagaactaattatcttcaat
ggctgaggtctctctttacagtgtagcactcctcctcaagtcctattgtttgctcctctataatttcaaaagtcactgctctctcactcaccactatecagtagtcaacctattattctgccc
ttactactacaatgacctaactgttcacccctttatgtagcaagccatftttgacactatgtacactgtagccatattgatttttcaaatetaatacaattgtcatctctcttatacttttaata
gcttgaatttttataatagagcaaaacactcaataatcgtctgtatttttttaacaacatgtgctttttggccatataccaatacttcaactcaatcaggaccctatacatgctGtcc
attcagcagaacac ATTAAATCGGATCCGGCCGCGGAAGGATCTGCG
  
```

**B**

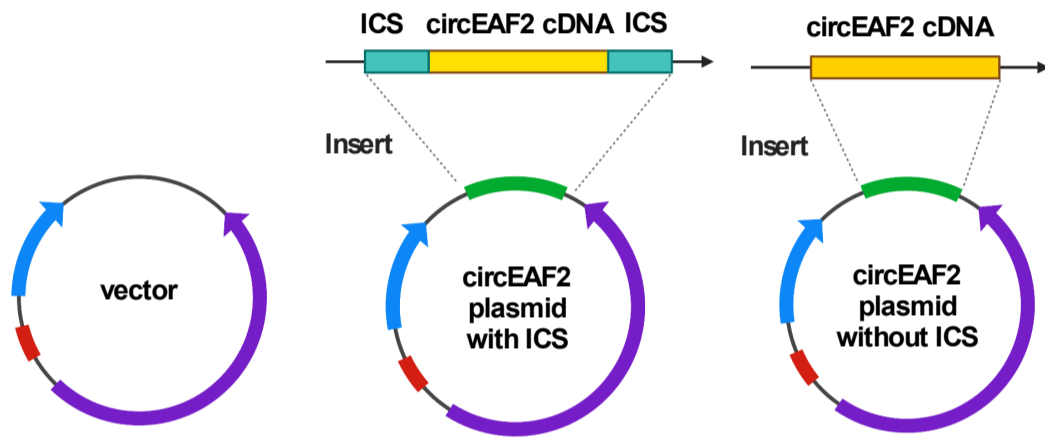

**C**

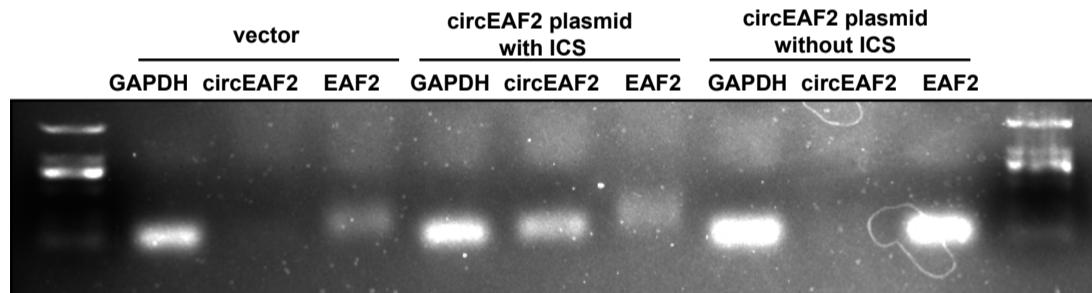

**D**

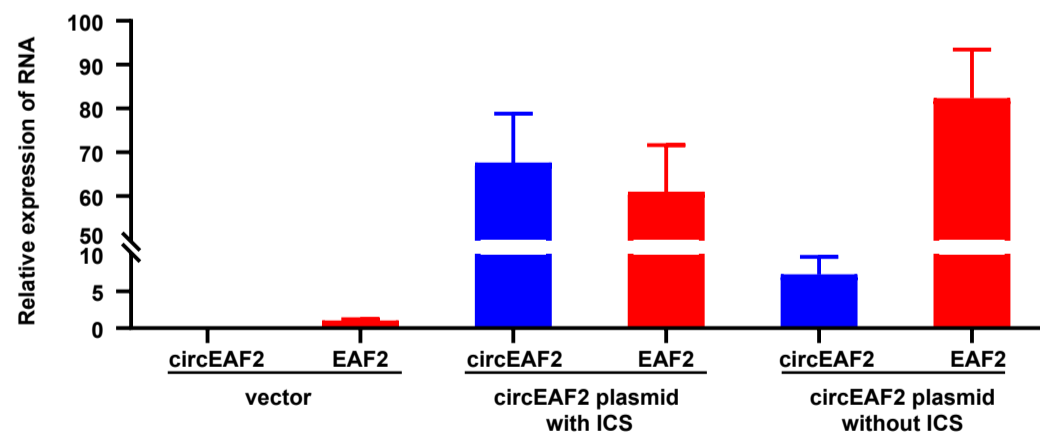

**Figure S1. Construction and verification for circEAF2 plasmid.**

(A) The designed sequences for circEAF2 plasmid. The yellow region indicates the mature sequence of circEAF2 cDNA. The blue region indicates the intronic complementary sequence (ICS) of *EAF2* (ENSG00000145088) and the green region indicates the restriction enzyme cutting site. (B) Schematic model shows the lentiviral plasmid constructs of vector, circEAF2 plasmid with ICS and circEAF2 plasmid without ICS. qPCR assay divergent or convergent primers indicated the existence of circEAF2 or linear EAF2, respectively. As shown in nucleic acid electrophoresis (C) and relative expression of RNA (D), compared with vector, circEAF2 plasmid with ICS notably increased the expression of circular EAF2, while circEAF2 plasmid without ICS only increased the expression of linear RNA, but not circular RNA. ICS, intronic complementary sequence.
