# Supplementary material for: CircEAF2 counteracts Epstein-Barr virus-positive diffuse large B-cell lymphoma progression via miR-BART19-3p/APC/β-catenin axis
Source: PubMed Central journal article supplement (PMC8638185; doi:10.1186/s12943-021-01458-9), 2021-12-01
Supplement: 12943_2021_1458_MOESM5_ESM.pdf [file 12943_2021_1458_MOESM5_ESM.pdf]

**A**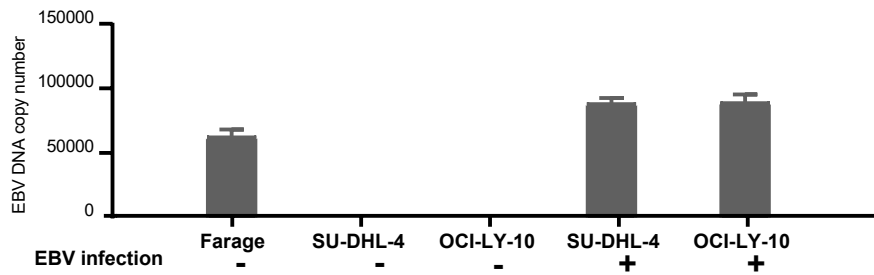**B**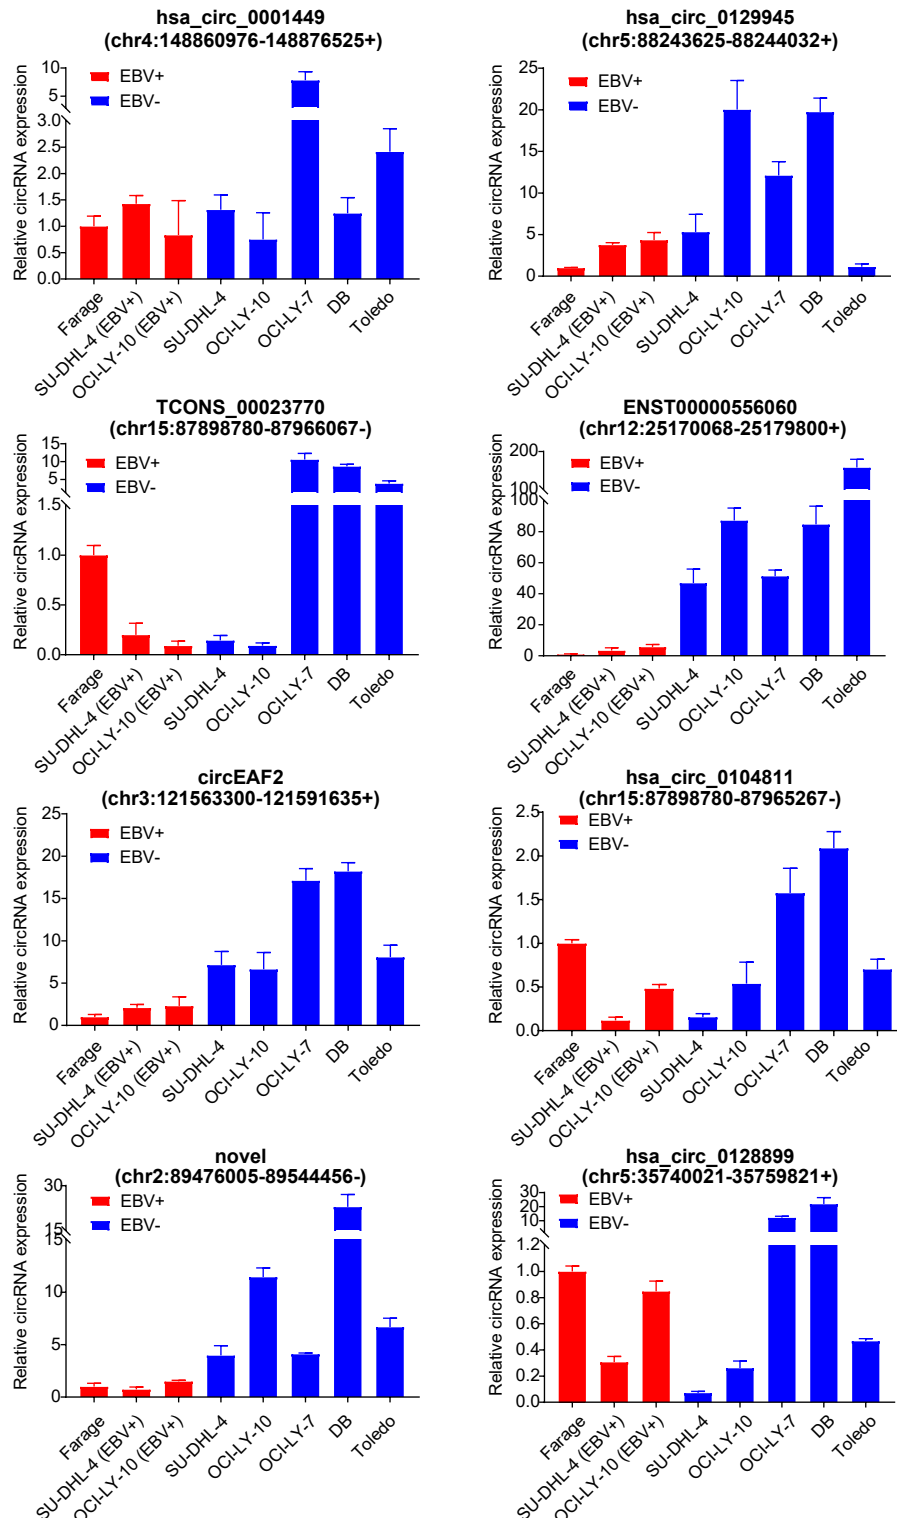**Figure S2. Verification of EBV-related circRNAs in B-lymphoma cell lines.**

(A). B-lymphoma cell line (SU-DHL-4 and OCI-LY-10) were successfully infected with EBV and showed significantly higher of EBV DNA copy number. Representative sample of EBV-infected cell line (Farage) was used as positive control. (B). qRT-PCR was performed to verify the relative expression of the eight candidate circRNAs in B-lymphoma cell lines with or without EBV infection. All the data are shown as the mean  $\pm$  S.D.
