# Supplementary material for: CircEAF2 counteracts Epstein-Barr virus-positive diffuse large B-cell lymphoma progression via miR-BART19-3p/APC/β-catenin axis
Source: PubMed Central journal article supplement (PMC8638185; doi:10.1186/s12943-021-01458-9), 2021-12-01
Supplement: 12943_2021_1458_MOESM7_ESM.pdf [file 12943_2021_1458_MOESM7_ESM.pdf]

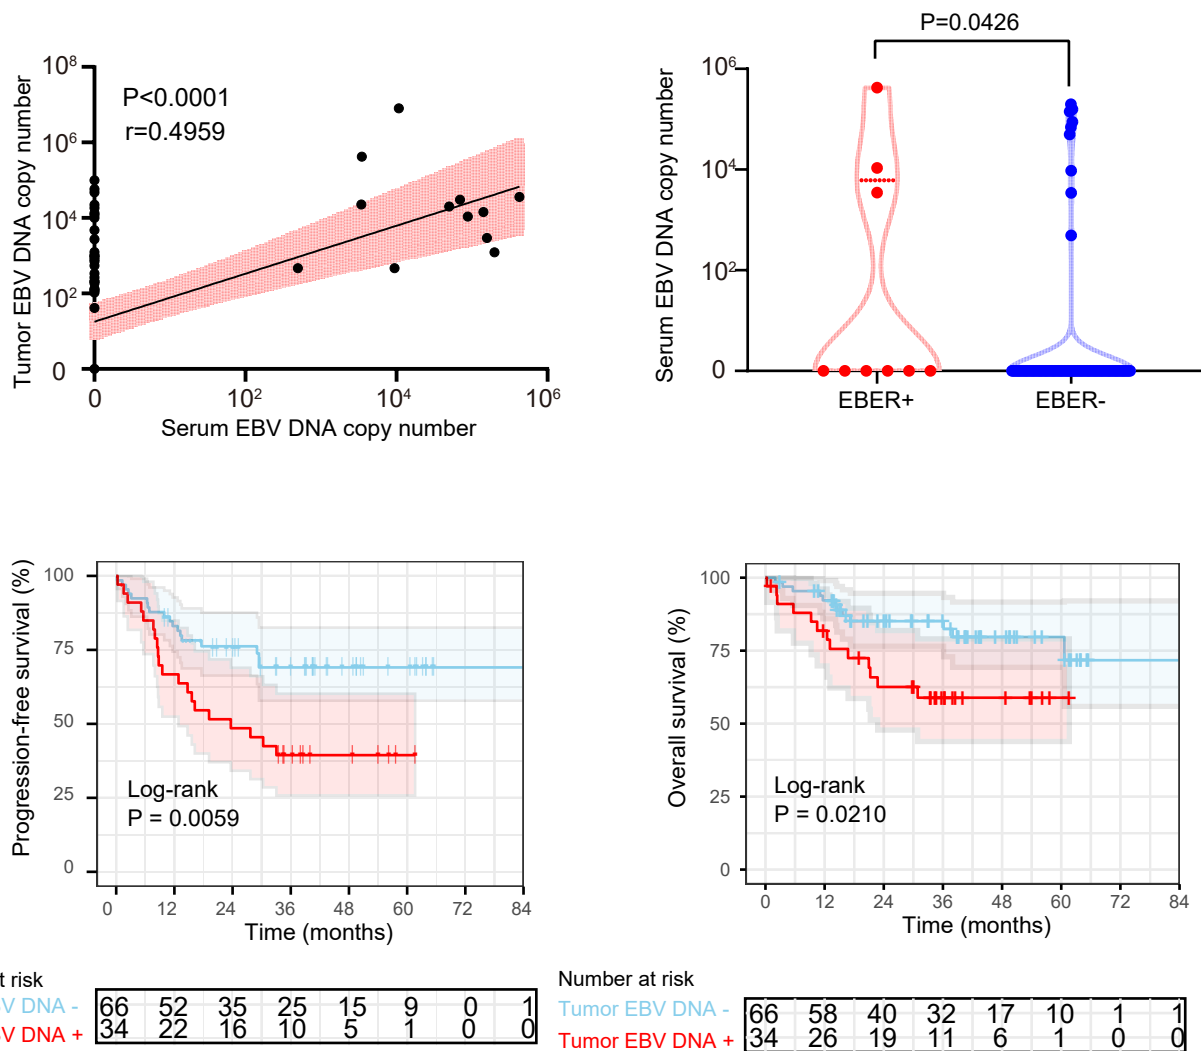

**Figure S4. Tumor EBV DNA is associated with serum EBV DNA and clinical outcomes in DLBCL patients.**

(A) Correlations of serum EBV DNA load with tumor EBV DNA load or tumor EBER-ISH in DLBCL patients. (B) Progression-free survival (PFS) and overall survival (OS) of DLBCL patients according to tumor EBV DNA.
